# Supplementary material for: Characterization of Listeria monocytogenes Strains Isolated in Palermo (Sicily and Italy) during the Years 2018–2020 from Severe Cases of Listeriosis
Source: MDPI journal article supplement (doi:10.3390/antibiotics13010057), 2024-01-06
Supplement: s1 [file s1]

## SUPPLEMENTARY INFORMATION

**TABLE S1. Information of the 23 Listeriosis patients.**

| Patient n° | Sex | Age | Culture Sites | Risk Factors         | Main Diagnose                                                                   |
|------------|-----|-----|---------------|----------------------|---------------------------------------------------------------------------------|
| 1          | F   | 82y | CSF           | >65                  | Meningitis, pleural effusion                                                    |
| 2          | F   | 65y | Blood         | ≥65<br>Cancer        | Bacteremia, Cough, abdominal pain                                               |
| 3          | F   | 49y | Blood + CSF   | Obese                | Meningitis                                                                      |
| 4          | F   | 83y | CSF           | >65                  | Meningitis                                                                      |
| 5          | M   | 81y | CSF           | >65                  | Meningitis                                                                      |
| 6          | F   | 55y | Blood         | Obese                | Meningitis                                                                      |
| 7          | F   | 28y | Blood + CSF   | Pregnancy-associated | Meningitis<br><br>Mother: Vomiting, Fever,<br>Birthinduction                    |
| 8          | M   | 80y | Ascitic fluid | >65                  | Meningitis                                                                      |
| 9          | M   | 1d  | Blood.        | Pregnancy-associated | Meningitis<br><br>Mother: Sepsis, meningitis                                    |
| 10         | M   | 72y | CSF           | >65                  | Meningitis                                                                      |
| 11         | F   | 1d  | Blood.        | Pregnancy-associated | Bacteremia and meningitis<br><br>Mother: track alteration and<br>severeasphyxia |
| 12         | F   | 78y | CSF           | > 65                 | Meningitis                                                                      |
| 13         | M   | 73y | Blood         | > 65                 | Meningitis, Fever                                                               |
| 14         | M   | 68y | Blood         | > 65                 | Bacteremia                                                                      |
| 15         | M   | 1d  | Nasal swab    | Pregnancy-associated | Respiratory distress                                                            |
| 16         | M   | 66y | Blood + CSF   | > 65<br><br>Leukemia | Bacteremia                                                                      |
| 17         | M   | 37y | CSF           | Obese                | Meningitis                                                                      |
| 18         | F   | 73y | Blood         | >65                  | Bacteremia                                                                      |
| 19         | M   | 78y | Blood         | >65                  | Bacteremia                                                                      |

|    |   |     |        |                      |                                                     |
|----|---|-----|--------|----------------------|-----------------------------------------------------|
| 20 | M | 51y | Blood  | Lung Cancer          | Bacteremia, fever and cough                         |
| 21 | F | 35y | Blood  | Pregnancy-associated | Bacteremia                                          |
| 22 | M | 71y | Blood. | >65                  | Bacteremia                                          |
| 23 | M | 73y | Blood. | >65                  | Bacteremia, Rectorrhagia from<br>ulcerative colitis |

TABLE S2. MLST, MvLST and serovar of 23 LM isolates.

| MLST   |         |       |      |     |       |     |      |      | MvLST |     |      |     |      |      |      |      | VT | EC |
|--------|---------|-------|------|-----|-------|-----|------|------|-------|-----|------|-----|------|------|------|------|----|----|
| SAMPLE | Serovar | abc-z | bgla | cat | dap-e | dat | Ldh1 | lhka | ST    | CC  | clpP | dal | inlB | inlC | lisR | prfA |    |    |
| 1      | IVb     | 1     | 1    | 11  | 11    | 2   | 1    | 5    | 2     | 2   | 4    | 5   | 14   | 14   | 3    | 2    | 21 | IV |
| 2      | IVb     | 1     | 1    | 11  | 11    | 2   | 1    | 5    | 2     | 2   | 4    | 5   | 14   | 14   | 3    | 2    | 21 | IV |
| 3      | IVb     | 1     | 1    | 11  | 11    | 2   | 1    | 5    | 2     | 2   | 4    | 5   | 14   | 14   | 3    | 2    | 21 | IV |
| 4      | IVb     | 1     | 1    | 11  | 11    | 2   | 1    | 5    | 2     | 2   | 4    | 5   | 14   | 14   | 3    | 2    | 21 | IV |
| 5      | IVb     | 3     | 9    | 9   | 3     | 3   | 1    | 5    | 6     | 6   | 4    | 10  | 13   | 10   | 2    | 2    | 19 | II |
| 6      | IVb     | 1     | 1    | 11  | 3     | 3   | 1    | 5    | 2     | 2   | 4    | 5   | 14   | 14   | 3    | 2    | 21 | IV |
| 7      | IVb     | 1     | 1    | 11  | 11    | 2   | 1    | 5    | 2     | 2   | 4    | 5   | 14   | 14   | 3    | 2    | 21 | IV |
| 8      | IVb     | 1     | 1    | 11  | 11    | 2   | 1    | 5    | 2     | 2   | 4    | 5   | 14   | 14   | 3    | 2    | 21 | IV |
| 9      | IVb     | 1     | 1    | 11  | 11    | 2   | 1    | 5    | 2     | 2   | 4    | 5   | 14   | 14   | 3    | 2    | 21 | IV |
| 10     | IVb     | 1     | 1    | 11  | 11    | 2   | 1    | 5    | 2     | 2   | 4    | 5   | 14   | 14   | 3    | 2    | 21 | IV |
| 11     | IVb     | 1     | 11   | 11  | 11    | 2   | 1    | 5    | 2     | 2   | 4    | 5   | 14   | 14   | 3    | 2    | 21 | IV |
| 12     | IVb     | 1     | 1    | 11  | 11    | 2   | 1    | 5    | 2     | 2   | 4    | 5   | 14   | 14   | 3    | 2    | 21 | IV |
| 13     | IVb     | 1     | 1    | 11  | 11    | 2   | 1    | 5    | 2     | 2   | 4    | 5   | 14   | 14   | 3    | 2    | 21 | IV |
| 14     | IVb     | 1     | 1    | 11  | 11    | 2   | 1    | 5    | 2     | 2   | 4    | 5   | 14   | 14   | 3    | 2    | 21 | IV |
| 15     | IVb     | 1     | 1    | 11  | 11    | 2   | 1    | 5    | 2     | 2   | 4    | 5   | 14   | 14   | 3    | 2    | 21 | IV |
| 16     | IVb     | 1     | 1    | 11  | 11    | 2   | 1    | 5    | 2     | 2   | 4    | 5   | 14   | 14   | 3    | 2    | 21 | IV |
| 17     | IVb     | 1     | 1    | 11  | 11    | 2   | 1    | 5    | 2     | 2   | 4    | 5   | 14   | 14   | 3    | 2    | 21 | IV |
| 18     | IVb     | 1     | 1    | 11  | 11    | 2   | 1    | 5    | 2     | 2   | 4    | 5   | 14   | 14   | 3    | 2    | 21 | IV |
| 19     | IVb     | 1     | 1    | 11  | 11    | 2   | 1    | 5    | 2     | 2   | 4    | 5   | 14   | 14   | 3    | 2    | 21 | IV |
| 20     | IVb     | 1     | 1    | 11  | 11    | 2   | 1    | 5    | 2     | 2   | 4    | 5   | 14   | 14   | 3    | 2    | 21 | IV |
| 21     | IVb     | 1     | 1    | 11  | 11    | 2   | 1    | 5    | 2     | 2   | 4    | 5   | 14   | 14   | 3    | 2    | 21 | IV |
| 22     | IVb     | 1     | 1    | 11  | 11    | 2   | 1    | 5    | 2     | 2   | 4    | 5   | 14   | 14   | 3    | 2    | 21 | IV |
| 23     | IIa     | 7     | 10   | 16  | 7     | 5   | 2    | 1    | 155   | 155 | 31   | 19  | 5    | 9    | 12   | 1    | 45 | IV |
